# Supplementary material for: Animal Models for Limbal Stem Cell Deficiency: A Critical Narrative Literature Review
Source: Springer Nature journal article supplement (doi:10.1007/s40123-023-00880-0), 2024-01-27
Supplement: MOESM1 [file 26667432]

**Title:** Animal models for limbal stem cell deficiency: a critical narrative literature review

**Authors:** Eray Atalay<sup>1</sup>, Burcugül Altuğ<sup>2</sup>, Mert Egemen Çalışkan<sup>3</sup>, Semih Ceylan<sup>3</sup>, Zeynep Serra Özler<sup>3</sup>, Gustavo Figueiredo<sup>4</sup>, Majlinda Lako<sup>5</sup>, Francisco Figueiredo<sup>5,6</sup>

**Affiliations:**

1. Department of Ophthalmology, Eskişehir Osmangazi University Medical School, Eskişehir, Türkiye
2. Cellular Therapy and Stem Cell Production Application, Research Centre (ESTEM), Eskişehir Osmangazi University, Eskişehir, Türkiye
3. Eskişehir Osmangazi University Medical School, Eskişehir, Türkiye
4. County Durham and Darlington NHS Foundation Trust, Darlington, UK
5. Biosciences Institute, Faculty of Medical Sciences, Newcastle University, Newcastle Upon Tyne, UK
6. Department of Ophthalmology, Royal Victoria Infirmary, Newcastle upon Tyne, UK

**Correspondence to:** Professor Francisco Figueiredo, Royal Victoria Infirmary, Dept of Ophthalmology, Newcastle University, NE1 4LP, UK, francisco.figueiredo@newcastle.ac.uk

**Figure 1.** Publications relevant to the construction of this figure were identified through a comprehensive search conducted on PubMed, Medline, and the Web of Science Core Collection. The search criteria were restricted to articles published in the English language. After the initial screening using predefined search terms, the studies were then manually filtered to include only those involving animal models exhibiting total limbal stem cell deficiency. The definition of total limbal stem cell deficiency encompassed injuries that involved the entire circumferential limbus, with or without epithelial removal. The categorization of the studies was based on their purpose: **therapeutic studies** involve testing interventions like stem cell therapy or biomedical devices; **biological pathway and/or biomarker studies** delve into understanding biological pathways and discovering novel disease biomarkers related to LSCD; and **model development studies** focus solely on creating innovative animal models for LSCD. The following search terms were used for initial screening: “limbal stem cell deficiency” [Title/Abstract], “limbal stem cell failure” [Title/Abstract], “limbal injury” [Title/Abstract], “ocular surface chemical injury” [Title/Abstract], “ocular surface alkali injury” [Title/Abstract], “LSCD” [Title/Abstract], “limbal insufficiency” [Title/Abstract], “limbal alkali injury” [Title/Abstract], “ocular surface burns” [Title/Abstract]. The list of articles used for the construction of this figure is provided below.

#### **List of studies involving mouse models**

##### **(1-16)**

1. Afsharkhamseh N, Movahedan A, Gidfar S, Huvard M, Wasielewski L, Milani BY, et al. Stability of limbal stem cell deficiency after mechanical and thermal injuries in mice. *Exp Eye Res.* 2016;145:88-92.
2. Kethiri AR, Raju E, Bokara KK, Mishra DK, Basu S, Rao CM, et al. Inflammation, vascularization and goblet cell differences in LSCD: Validating animal models of corneal alkali burns. *Exp Eye Res.* 2019;185:107665.
3. Kadar T, Horwitz V, Cohen M, Egoz I, Gutman H, Gez R, et al. Limbal stem cell deficiency (LSCD) in rats and mice following whole body exposure to sulfur mustard (SM) vapor. *Exp Eye Res.* 2022;223:109195.
4. Park M, Mazalo J, Di Girolamo N. Insulin-like growth factor binding protein-7: A marker of conjunctivalization in an animal model of limbal stem cell deficiency. *Ocul Surf.* 2019;17(3):447-57.
5. Das P, Pereira JA, Chaklader M, Law A, Bagchi K, Bhaduri G, et al. Phenotypic alteration of limbal niche-associated limbal epithelial stem cell deficiency by ultraviolet-B exposure-induced phototoxicity in mice. *Biochem Cell Biol.* 2013;91(3):165-75.

6. Lin Z, He H, Zhou T, Liu X, Wang Y, He H, et al. A mouse model of limbal stem cell deficiency induced by topical medication with the preservative benzalkonium chloride. *Invest Ophthalmol Vis Sci.* 2013;54(9):6314-25.
7. Richardson A, Park M, Watson SL, Wakefield D, Di Girolamo N. Visualizing the Fate of Transplanted K14-Confetti Corneal Epithelia in a Mouse Model of Limbal Stem Cell Deficiency. *Invest Ophthalmol Vis Sci.* 2018;59(3):1630-40.
8. Puri S, Sun M, Mutoji KN, Gesteira TF, Coulson-Thomas VJ. Epithelial Cell Migration and Proliferation Patterns During Initial Wound Closure in Normal Mice and an Experimental Model of Limbal Stem Cell Deficiency. *Invest Ophthalmol Vis Sci.* 2020;61(10):27.
9. Di GH, Qi X, Xu J, Yu CQ, Cao QL, Xing ZJ, et al. Therapeutic effect of secretome from TNF-alpha stimulated mesenchymal stem cells in an experimental model of corneal limbal stem cell deficiency. *Int J Ophthalmol.* 2021;14(2):179-85.
10. Alemi H, Dehghani S, Forouzanfar K, Surico PL, Narimatsu A, Musayeva A, et al. Insights into mustard gas keratopathy- characterizing corneal layer-specific changes in mice exposed to nitrogen mustard. *Exp Eye Res.* 2023;236:109657.
11. Amirjamshidi H, Milani BY, Sagha HM, Movahedan A, Shafiq MA, Lavker RM, et al. Limbal fibroblast conditioned media: a non-invasive treatment for limbal stem cell deficiency. *Mol Vis.* 2011;17:658-66.
12. Meyer-Blazejewska EA, Call MK, Yamanaka O, Liu H, Schlotzer-Schrehardt U, Kruse FE, et al. From hair to cornea: toward the therapeutic use of hair follicle-derived stem cells in the treatment of limbal stem cell deficiency. *Stem Cells.* 2011;29(1):57-66.
13. Lin KJ, Loi MX, Lien GS, Cheng CF, Pao HY, Chang YC, et al. Topical administration of orbital fat-derived stem cells promotes corneal tissue regeneration. *Stem Cell Res Ther.* 2013;4(3):72.
14. Majo F, Rochat A, Nicolas M, Jaoude GA, Barrandon Y. Oligopotent stem cells are distributed throughout the mammalian ocular surface. *Nature.* 2008;456(7219):250-4.
15. Moore JE, McMullen TC, Campbell IL, Rohan R, Kaji Y, Afshari NA, et al. The inflammatory milieu associated with conjunctivalized cornea and its alteration with IL-1 RA gene therapy. *Invest Ophthalmol Vis Sci.* 2002;43(9):2905-15.
16. Shadmani A, Dhowre HS, Ercal O, Meng XQ, Wu AY. Corneal and Limbal Alkali Injury Induction Using a Punch-Trephine Technique in a Mouse Model. *J Vis Exp.* 2023(198).

### **List of studies involving rat models**

#### **(1-13)**

1. Gong D, Yan C, Yu F, Yan D, Wu N, Chen L, et al. Direct oral mucosal epithelial transplantation supplies stem cells and promotes corneal wound healing to treat refractory persistent corneal epithelial defects. *Exp Eye Res.* 2022;215:108934.
2. Bu P, Vin AP, Sethupathi P, Ambrecht LA, Zhai Y, Nikolic N, et al. Effects of activated omental cells on rat limbal corneal alkali injury. *Exp Eye Res.* 2014;121:143-6.
3. Rohaina CM, Then KY, Ng AM, Wan Abdul Halim WH, Zahidin AZ, Saim A, et al. Reconstruction of limbal stem cell deficient corneal surface with induced human bone marrow mesenchymal stem cells on amniotic membrane. *Transl Res.* 2014;163(3):200-10.
4. Li W, Li Q, Wang W, Li K, Ling S, Yang Y, et al. A rat model of autologous oral mucosal epithelial transplantation for corneal limbal stem cell failure. *Eye Sci.* 2014;29(1):1-5.

5. Soma T, Hayashi R, Sugiyama H, Tsujikawa M, Kanayama S, Oie Y, et al. Maintenance and distribution of epithelial stem/progenitor cells after corneal reconstruction using oral mucosal epithelial cell sheets. *Plos One*. 2014;9(10):e110987.
6. Loureiro RR, Cristovam PC, da Rosa LR, Nova L, Gasparetto G, Gil CD, et al. Analysis of different conditioned media secreted by limbal progenitor cells in the modulation of corneal healing. *Exp Eye Res*. 2022;215:108907.
7. Kadar T, Horwitz V, Cohen M, Egoz I, Gutman H, Gez R, et al. Limbal stem cell deficiency (LSCD) in rats and mice following whole body exposure to sulfur mustard (SM) vapor. *Exp Eye Res*. 2022;223:109195.
8. Shadmani A, Razmkhah M, Jalalpoor MH, Lari SY, Eghtedari M. Autologous Activated Omental versus Allogeneic Adipose Tissue-Derived Mesenchymal Stem Cells in Corneal Alkaline Injury: An Experimental Study. *J Curr Ophthalmol*. 2021;33(2):136-42.
9. Jiang TS, Cai L, Ji WY, Hui YN, Wang YS, Hu D, et al. Reconstruction of the corneal epithelium with induced marrow mesenchymal stem cells in rats. *Mol Vis*. 2010;16:1304-16.
10. Wang H, Han J, Hu F, Zhang C, Zhao K, Mu N, et al. Novel Animal Model of Limbal Stem Cell Deficiency Induced by Forcing Eye-Open at Birth. *Cornea*. 2023;42(7):874-87.
11. Bandeira F, Goh TW, Setiawan M, Yam GH, Mehta JS. Cellular therapy of corneal epithelial defect by adipose mesenchymal stem cell-derived epithelial progenitors. *Stem Cell Res Ther*. 2020;11(1):14.
12. Ma Y, Xu Y, Xiao Z, Yang W, Zhang C, Song E, et al. Reconstruction of chemically burned rat corneal surface by bone marrow-derived human mesenchymal stem cells. *Stem Cells*. 2006;24(2):315-21.
13. Xiao YT, Xie HT, Liu X, Duan CY, Qu JY, Zhang MC, et al. Subconjunctival Injection of Transdifferentiated Oral Mucosal Epithelial Cells for Limbal Stem Cell Deficiency in Rats. *J Histochem Cytochem*. 2021;69(3):177-90.

### **List of studies involving rabbit models**

#### **(1-83)**

1. Sugiyama H, Yamato M, Nishida K, Okano T. Evidence of the survival of ectopically transplanted oral mucosal epithelial stem cells after repeated wounding of cornea. *Mol Ther*. 2014;22(8):1544-55.
2. Xiang J, Sun J, Hong J, Wang W, Wei A, Le Q, et al. T-style keratoprosthesis based on surface-modified poly (2-hydroxyethyl methacrylate) hydrogel for cornea repairs. *Mater Sci Eng C Mater Biol Appl*. 2015;50:274-85.
3. Gu C, Yang J, Yuan Y, Yao M, Zhang X. The safety of photochemical tissue bonding for treating damaged corneal epithelium using limbal stem cells pre-cultured on human amniotic membrane. *J Photochem Photobiol B*. 2015;148:59-65.
4. Bardag-Gorce F, Oliva J, Wood A, Hoft R, Pan D, Thropay J, et al. Carrier-free cultured autologous oral mucosa epithelial cell sheet (CAOMECS) for corneal epithelium reconstruction: a histological study. *Ocul Surf*. 2015;13(2):150-63.
5. Bardag-Gorce F, Hoft R, Meepe I, Garcia J, Tiger K, Wood A, et al. Proteasomes in corneal epithelial cells and cultured autologous oral mucosal epithelial cell sheet (CAOMECS) graft used for the ocular surface regeneration. *Ocul Surf*. 2017;15(4):749-58.
6. He J, Ou S, Ren J, Sun H, He X, Zhao Z, et al. Tissue engineered corneal epithelium derived from clinical-grade human embryonic stem cells. *Ocul Surf*. 2020;18(4):672-80.
7. Zhou Z, Long D, Hsu CC, Liu H, Chen L, Slavin B, et al. Nanofiber-reinforced decellularized amniotic membrane improves limbal stem cell transplantation in a rabbit model of corneal epithelial defect. *Acta Biomater*. 2019;97:310-20.

8. Ti SE, Anderson D, Touhami A, Kim C, Tseng SC. Factors affecting outcome following transplantation of ex vivo expanded limbal epithelium on amniotic membrane for total limbal deficiency in rabbits. *Invest Ophthalmol Vis Sci.* 2002;43(8):2584-92.
9. Zhao M, Zhang H, Zhen D, Huang M, Li W, Li Z, et al. Corneal Recovery Following Rabbit Peripheral Blood Mononuclear Cell-Amniotic Membrane Transplantation with Antivasular Endothelial Growth Factor in Limbal Stem Cell Deficiency Rabbits. *Tissue Eng Part C Methods.* 2020;26(10):541-52.
10. Ti SE, Grueterich M, Espana EM, Touhami A, Anderson DF, Tseng SC. Correlation of long term phenotypic and clinical outcomes following limbal epithelial transplantation cultivated on amniotic membrane in rabbits. *Br J Ophthalmol.* 2004;88(3):422-7.
11. Espana EM, Ti SE, Grueterich M, Touhami A, Tseng SC. Corneal stromal changes following reconstruction by ex vivo expanded limbal epithelial cells in rabbits with total limbal stem cell deficiency. *Br J Ophthalmol.* 2003;87(12):1509-14.
12. Qiu T, Cui L, Xu JJ, Hong JX, Xiang J. Reconstruction of the ocular surface by autologous transplantation of rabbit adipose tissue-derived stem cells on amniotic membrane. *Ann Transl Med.* 2020;8(17):1062.
13. Bardag-Gorce F, Hoft RH, Wood A, Oliva J, Niihara H, Makalinao A, et al. The Role of E-Cadherin in Maintaining the Barrier Function of Corneal Epithelium after Treatment with Cultured Autologous Oral Mucosa Epithelial Cell Sheet Grafts for Limbal Stem Deficiency. *J Ophthalmol.* 2016;2016:4805986.
14. Ye J, Yao K, Kim JC. Mesenchymal stem cell transplantation in a rabbit corneal alkali burn model: engraftment and involvement in wound healing. *Eye (Lond).* 2006;20(4):482-90.
15. Reinshagen H, Auw-Haedrich C, Sorg RV, Boehringer D, Eberwein P, Schwartzkopff J, et al. Corneal surface reconstruction using adult mesenchymal stem cells in experimental limbal stem cell deficiency in rabbits. *Acta Ophthalmol.* 2011;89(8):741-8.
16. Chae JJ, Ambrose WM, Espinoza FA, Mulreany DG, Ng S, Takezawa T, et al. Regeneration of corneal epithelium utilizing a collagen vitrigel membrane in rabbit models for corneal stromal wound and limbal stem cell deficiency. *Acta Ophthalmol.* 2015;93(1):e57-66.
17. Kadar T, Amir A, Cohen L, Cohen M, Sahar R, Gutman H, et al. Anti-VEGF therapy (bevacizumab) for sulfur mustard-induced corneal neovascularization associated with delayed limbal stem cell deficiency in rabbits. *Curr Eye Res.* 2014;39(5):439-50.
18. Sanie-Jahromi F, Eghtedari M, Mirzaei E, Jalalpour MH, Asvar Z, Nejabat M, et al. Propagation of limbal stem cells on polycaprolactone and polycaprolactone/gelatin fibrous scaffolds and transplantation in animal model. *Bioimpacts.* 2020;10(1):45-54.
19. Monteiro BG, Serafim RC, Melo GB, Silva MC, Lizier NF, Maranduba CM, et al. Human immature dental pulp stem cells share key characteristic features with limbal stem cells. *Cell Prolif.* 2009;42(5):587-94.
20. Sun J, Liu WH, Deng FM, Luo YH, Wen K, Zhang H, et al. Differentiation of rat adipose-derived mesenchymal stem cells into corneal-like epithelial cells driven by PAX6. *Exp Ther Med.* 2018;15(2):1424-32.
21. Zhao H, Qu M, Wang Y, Wang Z, Shi W. Xenogeneic acellular conjunctiva matrix as a scaffold of tissue-engineered corneal epithelium. *Plos One.* 2014;9(11):e111846.
22. Nishida K, Yamato M, Hayashida Y, Watanabe K, Maeda N, Watanabe H, et al. Functional bioengineered corneal epithelial sheet grafts from corneal stem cells expanded ex vivo on a temperature-responsive cell culture surface. *Transplantation.* 2004;77(3):379-85.
23. Luengo Gimeno F, Lavigne V, Gatto S, Croxatto JO, Correa L, Gallo JE. Advances in corneal stem-cell transplantation in rabbits with severe ocular alkali burns. *J Cataract Refract Surg.* 2007;33(11):1958-65.

24. Hong H, Huh MI, Park SM, Lee KP, Kim HK, Kim DS. Decellularized corneal lenticule embedded compressed collagen: toward a suturable collagenous construct for limbal reconstruction. *Biofabrication*. 2018;10(4):045001.
25. Li FJ, Nili E, Lau C, Richardson NA, Walshe J, Barnett NL, et al. Evaluation of the AlgerBrush II rotating burr as a tool for inducing ocular surface failure in the New Zealand White rabbit. *Exp Eye Res*. 2016;147:1-11.
26. Kethiri AR, Raju E, Bokara KK, Mishra DK, Basu S, Rao CM, et al. Inflammation, vascularization and goblet cell differences in LSCD: Validating animal models of corneal alkali burns. *Exp Eye Res*. 2019;185:107665.
27. Kethiri AR, Singh VK, Damala M, Basu S, Rao CM, Bokara KK, et al. Long term observation of ocular surface alkali burn in rabbit models: Quantitative analysis of corneal haze, vascularity and self-recovery. *Exp Eye Res*. 2021;205:108526.
28. Villabona-Martinez V, Sampaio LP, Shiju TM, Wilson SE. Standardization of corneal alkali burn methodology in rabbits. *Exp Eye Res*. 2023;230:109443.
29. Bardag-Gorce F, Makalinao A, Meepe I, Hoft RH, Cortez D, Oliva J, et al. Corneal keratin aggresome (CKAGG) formation and clearance by proteasome activation. *Heliyon*. 2018;4(12):e01012.
30. Kadar T, Horwitz V, Sahar R, Cohen M, Cohen L, Gez R, et al. Delayed loss of corneal epithelial stem cells in a chemical injury model associated with limbal stem cell deficiency in rabbits. *Curr Eye Res*. 2011;36(12):1098-107.
31. Kadar T, Dachir S, Cohen M, Gutman H, Cohen L, Brandeis R, et al. Prolonged impairment of corneal innervation after exposure to sulfur mustard and its relation to the development of delayed limbal stem cell deficiency. *Cornea*. 2013;32(4):e44-50.
32. Kobashigawa KK, Aldrovani M, Barros Sobrinho AAF, Silva P, Marcusso PF, Marinho-Neto FA, et al. Clinical features and corneal optical anisotropies in a rabbit model of limbal stem cell deficiency. *Arq Bras Oftalmol*. 2018;81(5):384-92.
33. Wang Z, Zhou Q, Duan H, Wang Y, Dong M, Shi W. Immunological Properties of Corneal Epithelial-Like Cells Derived from Human Embryonic Stem Cells. *Plos One*. 2016;11(3):e0150731.
34. Magalhaes OA, de Alcantara RJA, Gomes JAP, Caiado de Castro Neto J, Schor P. Titanium Powder 3D-Printing Technology for a Novel Keratoprosthesis in Alkali-Burned Rabbits. *Transl Vis Sci Technol*. 2022;11(8):14.
35. Bardag-Gorce F, Diaz A, Niihara R, Stark J, Cortez D, Lee A, et al. Aldehyde Dehydrogenases Expression in Corneal Epithelial Cells with Limbal Stem Cell Deficiency. *Int J Mol Sci*. 2022;23(7).
36. Khorolskaya JI, Perepletchikova DA, Zhurenkov KE, Kachkin DV, Rubel AA, Blinova MI, et al. Corneal Reconstruction with EGFP-Labelled Limbal Mesenchymal Stem Cells in a Rabbit Model of Limbal Stem Cell Deficiency. *Int J Mol Sci*. 2023;24(6).
37. Xu B, Fan TJ, Zhao J, Sun A, Wang RX, Hu XZ, et al. Transplantation of tissue-engineered human corneal epithelium in limbal stem cell deficiency rabbit models. *Int J Ophthalmol*. 2012;5(4):424-9.
38. Venugopal B, Shenoy SJ, Mohan S, Anil Kumar PR, Kumary TV. Bioengineered corneal epithelial cell sheet from mesenchymal stem cells-A functional alternative to limbal stem cells for ocular surface reconstruction. *J Biomed Mater Res B Appl Biomater*. 2020;108(3):1033-45.
39. Hyun DW, Kim YH, Koh AY, Lee HJ, Wee WR, Jeon S, et al. Characterization of biomaterial-free cell sheets cultured from human oral mucosal epithelial cells. *J Tissue Eng Regen Med*. 2017;11(3):743-50.
40. Lee H, Lee JH, Hong S, Sunwoo JH, Kim HT, Kim ES, et al. Transplantation of human corneal limbal epithelial cell sheet harvested on synthesized carboxymethyl cellulose and dopamine in a limbal stem cell deficiency. *J Tissue Eng Regen Med*. 2021;15(2):139-49.
41. Gu C, Ni T, Verter EE, Redmond RW, Kochevar IE, Yao M. Photochemical tissue bonding: a potential strategy for treating limbal stem cell deficiency. *Lasers Surg Med*. 2011;43(5):433-42.

42. Ono K, Yokoo S, Mimura T, Usui T, Miyata K, Araie M, et al. Autologous transplantation of conjunctival epithelial cells cultured on amniotic membrane in a rabbit model. *Mol Vis.* 2007;13:1138-43.
43. Gu S, Xing C, Han J, Tso MO, Hong J. Differentiation of rabbit bone marrow mesenchymal stem cells into corneal epithelial cells in vivo and ex vivo. *Mol Vis.* 2009;15:99-107.
44. Luengo Gimeno F, Lavigne V, Gatto S, Croxatto JO, Correa L, Gallo JE. One-year follow-up of epithelial corneal cell sheet allografts mounted on platelet poor plasma in rabbits. *Mol Vis.* 2009;15:2771-9.
45. Selver OB, Durak I, Gurdal M, Baysal K, Ates H, Ozbek Z, et al. Corneal recovery in a rabbit limbal stem cell deficiency model by autologous grafts of tertiary outgrowths from cultivated limbal biopsy explants. *Mol Vis.* 2016;22:138-49.
46. Ouyang H, Xue Y, Lin Y, Zhang X, Xi L, Patel S, et al. WNT7A and PAX6 define corneal epithelium homeostasis and pathogenesis. *Nature.* 2014;511(7509):358-61.
47. Dachir S, Gutman H, Gore A, Cohen L, Cohen M, Amir A, et al. Ocular Surface Changes After Sulfur Mustard Exposure in Rabbits, Monitored by Impression Cytology. *Cornea.* 2017;36(8):980-7.
48. Duan CY, Xie HT, Zhao XY, Zhang MC. Limbal niche cells: a novel feeder cell for autologous cultivated oral mucosal epithelial transplantation. *Regen Med.* 2019;14(1):49-62.
49. Tananuvat N, Bumroongkit K, Tocharusa C, Mevatee U, Kongkaew A, Ausayakhun S. Limbal stem cell and oral mucosal epithelial transplantation from ex vivo cultivation in LSCD-induced rabbits: histology and immunologic study of the transplant epithelial sheet. *International ophthalmology.* 2017;37(6):1289-98.
50. Reza HM, Ng BY, Gimeno FL, Phan TT, Ang LP. Umbilical cord lining stem cells as a novel and promising source for ocular surface regeneration. *Stem Cell Rev Rep.* 2011;7(4):935-47.
51. Li Y, Yang Y, Yang L, Zeng Y, Gao X, Xu H. Poly(ethylene glycol)-modified silk fibroin membrane as a carrier for limbal epithelial stem cell transplantation in a rabbit LSCD model. *Stem Cell Res Ther.* 2017;8(1):256.
52. Zhou Q, Liu XY, Ruan YX, Wang L, Jiang MM, Wu J, et al. Construction of corneal epithelium with human amniotic epithelial cells and repair of limbal deficiency in rabbit models. *Hum Cell.* 2015;28(1):22-36.
53. Lee HJ, Nam SM, Choi SK, Seo KY, Kim HO, Chung SH. Comparative study of substrate free and amniotic membrane scaffolds for cultivation of limbal epithelial sheet. *Sci Rep.* 2018;8(1):14628.
54. Inamochi A, Tomioka A, Kitamoto K, Miyai T, Usui T, Aihara M, et al. Simple oral mucosal epithelial transplantation in a rabbit model. *Sci Rep.* 2019;9(1):18088.
55. Zhang W, Yang W, Liu X, Zhang L, Huang W, Zhang Y. Rapidly constructed scaffold-free embryonic stem cell sheets for ocular surface reconstruction. *Scanning.* 2014;36(3):286-92.
56. Sitalakshmi G, Sudha B, Madhavan HN, Vinay S, Krishnakumar S, Mori Y, et al. Ex vivo cultivation of corneal limbal epithelial cells in a thermoreversible polymer (Mebiol Gel) and their transplantation in rabbits: an animal model. *Tissue Eng Part A.* 2009;15(2):407-15.
57. Galindo S, Herreras JM, Lopez-Paniagua M, Rey E, de la Mata A, Plata-Cordero M, et al. Therapeutic Effect of Human Adipose Tissue-Derived Mesenchymal Stem Cells in Experimental Corneal Failure Due to Limbal Stem Cell Niche Damage. *Stem Cells.* 2017;35(10):2160-74.
58. Brown KD, Low S, Mariappan I, Abberton KM, Short R, Zhang H, et al. Plasma polymer-coated contact lenses for the culture and transfer of corneal epithelial cells in the treatment of limbal stem cell deficiency. *Tissue Eng Part A.* 2014;20(3-4):646-55.
59. Transplantation of Preserved Human Amniotic Membrane for Surface Reconstruction in Severely Damaged Rabbit Corneas. *Cornea.* 2022;41(2):137-48.
60. Du Y, Chen J, Funderburgh JL, Zhu X, Li L. Functional reconstruction of rabbit corneal epithelium by human limbal cells cultured on amniotic membrane. *Mol Vis.* 2003;9:635-43.

61. Talbot M, Carrier P, Giasson CJ, Deschambeault A, Guerin SL, Auger FA, et al. Autologous transplantation of rabbit limbal epithelia cultured on fibrin gels for ocular surface reconstruction. *Mol Vis*. 2006;12:65-75.
62. Ang LP, Tanioka H, Kawasaki S, Ang LP, Yamasaki K, Do TP, et al. Cultivated human conjunctival epithelial transplantation for total limbal stem cell deficiency. *Invest Ophthalmol Vis Sci*. 2010;51(2):758-64.
63. Wan P, Wang X, Ma P, Gao N, Ge J, Mou Y, et al. Cell delivery with fixed amniotic membrane reconstructs corneal epithelium in rabbits with limbal stem cell deficiency. *Invest Ophthalmol Vis Sci*. 2011;52(2):724-30.
64. Gomes JA, Geraldles Monteiro B, Melo GB, Smith RL, Cavenaghi Pereira da Silva M, Lizier NF, et al. Corneal reconstruction with tissue-engineered cell sheets composed of human immature dental pulp stem cells. *Invest Ophthalmol Vis Sci*. 2010;51(3):1408-14.
65. Hayashida Y, Nishida K, Yamato M, Watanabe K, Maeda N, Watanabe H, et al. Ocular surface reconstruction using autologous rabbit oral mucosal epithelial sheets fabricated ex vivo on a temperature-responsive culture surface. *Invest Ophthalmol Vis Sci*. 2005;46(5):1632-9.
66. Omoto M, Miyashita H, Shimmura S, Higa K, Kawakita T, Yoshida S, et al. The use of human mesenchymal stem cell-derived feeder cells for the cultivation of transplantable epithelial sheets. *Invest Ophthalmol Vis Sci*. 2009;50(5):2109-15.
67. Zhu J, Zhang K, Sun Y, Gao X, Li Y, Chen Z, et al. Reconstruction of functional ocular surface by acellular porcine cornea matrix scaffold and limbal stem cells derived from human embryonic stem cells. *Tissue Eng Part A*. 2013;19(21-22):2412-25.
68. Kadar T, Dachir S, Cohen L, Sahar R, Fishbine E, Cohen M, et al. Ocular injuries following sulfur mustard exposure--pathological mechanism and potential therapy. *Toxicology*. 2009;263(1):59-69.
69. Kruse FE, Chen JJ, Tsai RJ, Tseng SC. Conjunctival transdifferentiation is due to the incomplete removal of limbal basal epithelium. *Invest Ophthalmol Vis Sci*. 1990;31(9):1903-13.
70. Huang AJ, Tseng SC. Corneal epithelial wound healing in the absence of limbal epithelium. *Invest Ophthalmol Vis Sci*. 1991;32(1):96-105.
71. Zhang H, Lin S, Zhang M, Li Q, Li W, Wang W, et al. Comparison of Two Rabbit Models with Deficiency of Corneal Epithelium and Limbal Stem Cells Established by Different Methods. *Tissue Eng Part C Methods*. 2017;23(11):710-7.
72. Schwab IR. Cultured corneal epithelia for ocular surface disease. *Trans Am Ophthalmol Soc*. 1999;97:891-986.
73. Kim YH, Kim DH, Shin EJ, Lee HJ, Wee WR, Jeon S, et al. Comparative Analysis of Substrate-Free Cultured Oral Mucosal Epithelial Cell Sheets from Cells of Subjects with and without Stevens-Johnson Syndrome for Use in Ocular Surface Reconstruction. *Plos One*. 2016;11(1):e0147548.
74. Holan V, Trosan P, Cejka C, Javorkova E, Zajicova A, Hermankova B, et al. A Comparative Study of the Therapeutic Potential of Mesenchymal Stem Cells and Limbal Epithelial Stem Cells for Ocular Surface Reconstruction. *Stem Cells Transl Med*. 2015;4(9):1052-63.
75. Andrade AL, Campos MQ, Gomes JA, Berto AG, Michelacci YM. Effect of amniotic membrane transplantation on corneal healing and proteoglycan expression in an experimental model of limbal deficiency in rabbits. *Eur J Ophthalmol*. 2010;20(2):290-9.
76. Jeon S, Choi SH, Wolosin JM, Chung SH, Joo CK. Regeneration of the corneal epithelium with conjunctival epithelial equivalents generated in serum- and feeder-cell-free media. *Mol Vis*. 2013;19:2542-50.
77. Kim MK, Heo JW, Lee JL, Wee WR, Lee JH. Adhesion complex in cultivated limbal epithelium on amniotic membrane after in vivo transplantation. *Curr Eye Res*. 2005;30(8):639-46.



78. Li QJ, Ashraf FM, Rana TS, Tuli S, Mai EL, Adler RA, et al. Long-term survival of allogeneic donor cell-derived corneal epithelium in limbal deficient rabbits. *Curr Eye Res.* 2001;23(5):336-45.
79. Lin CT, Hu FR, Kuo KT, Chen YM, Chu HS, Lin YH, et al. The different effects of early and late bevacizumab (Avastin) injection on inhibiting corneal neovascularization and conjunctivalization in rabbit limbal insufficiency. *Invest Ophthalmol Vis Sci.* 2010;51(12):6277-85.
80. Xu W, Liu K, Li T, Zhang W, Dong Y, Lv J, et al. An in situ hydrogel based on carboxymethyl chitosan and sodium alginate dialdehyde for corneal wound healing after alkali burn. *J Biomed Mater Res A.* 2019;107(4):742-54.
81. Avila M, Espana M, Moreno C, Pena C. Reconstruction of ocular surface with heterologous limbal epithelium and amniotic membrane in a rabbit model. *Cornea.* 2001;20(4):414-20.
82. Espandar L, Caldwell D, Watson R, Blanco-Mezquita T, Zhang S, Bunnell B. Application of adipose-derived stem cells on scleral contact lens carrier in an animal model of severe acute alkaline burn. *Eye Contact Lens.* 2014;40(4):243-7.
83. Gore A, Horwitz V, Gutman H, Tveria L, Cohen L, Cohen-Jacob O, et al. Cultivation and characterization of limbal epithelial stem cells on contact lenses with a feeder layer: toward the treatment of limbal stem cell deficiency. *Cornea.* 2014;33(1):65-71.
